# Supplementary material
Source: PubMed Central journal article supplement (PMC7643765)
Supplement: NIHMS1635701-supplement-Suppl_Table_7.pdf [file NIHMS1635701-supplement-Suppl_Table_7.pdf]

**Supplementary Table 7a. Complications: Open cases.**

|                                       | Pre-ERAS   | ERAS (early) | ERAS (late) | <i>p</i> |
|---------------------------------------|------------|--------------|-------------|----------|
| <b>n</b>                              | 377        | 299          | 303         |          |
| <b>Grade</b>                          |            |              |             | 0.65     |
| <b>No complication</b>                | 341 (90.5) | 271 (90.6)   | 273 (90.1)  |          |
| <b>1</b>                              | 6 (1.6)    | 6 (2.0)      | 9 (3.0)     |          |
| <b>2</b>                              | 17 (4.5)   | 8 (2.7)      | 11 (3.6)    |          |
| <b>3</b>                              | 13 (3.4)   | 12 (4.0)     | 9 (3.0)     |          |
| <b>4</b>                              | 0 (0)      | 2 (0.7)      | 1 (0.3)     |          |
| <b>5</b>                              | 0 (0)      | 0 (0)        | 0 (0)       |          |
| <b>Category</b>                       |            |              |             | 0.52     |
| <b>Cardiovascular system</b>          | 0 (0)      | 1 (0.3)      | 1 (0.3)     |          |
| <b>Gastrointestinal system</b>        | 10 (2.7)   | 9 (3.0)      | 14 (4.6)    |          |
| <b>General</b>                        | 5 (1.3)    | 2 (0.7)      | 1 (0.3)     |          |
| <b>Genitourinary system</b>           | 0 (0)      | 1 (0.3)      | 4 (1.3)     |          |
| <b>Hematologic or vascular system</b> | 5 (1.3)    | 3 (1.0)      | 2 (0.7)     |          |
| <b>Infection</b>                      | 9 (2.4)    | 8 (2.7)      | 4 (1.3)     |          |
| <b>Pulmonary system</b>               | 1 (0.3)    | 0 (0)        | 1 (0.3)     |          |
| <b>Wound or skin</b>                  | 6 (1.6)    | 4 (1.3)      | 3 (1.0)     |          |

ERAS, Enhanced Recovery after surgery. *p* = chi-square test.

**Supplementary Table 7b. Surgical site infections: Open cases, from SSI surveillance cases reported to National Healthcare Safety Network.**

|                       | Pre-ERAS          | ERAS (early)      | ERAS (late)       | <i>p</i> |
|-----------------------|-------------------|-------------------|-------------------|----------|
| <b>n reported (%)</b> | <b>139 (36.9)</b> | <b>126 (42.1)</b> | <b>106 (35.0)</b> |          |
| <b>SSI type</b>       |                   |                   |                   |          |
| <b>SIP (%)</b>        | 3 (2.2)           | 2 (1.6)           | 2 (1.9)           | 0.94     |
| <b>DIP (%)</b>        | 0 (0)             | 1 (0.8)           | 0 (0)             | 0.38     |
| <b>IAB (%)</b>        | 5 (3.6)           | 3 (2.4)           | 2 (1.9)           | 0.69     |

ERAS, Enhanced Recovery after surgery. SSI, surgical site infection. SIP, superficial incisional primary. DIP, deep incisional primary. IAB, intraabdominal infection. *p* = chi-square test.
