# Supplementary material
Source: PubMed Central journal article supplement (PMC7643765)

**Supplementary Figure 1. Adherence to ERAS metrics significantly increased over time: (A) MIS cases and (B) Open cases.** Violin plots. ERAS, Enhanced Recovery after surgery.  $p$  = Kruskal-Wallis, Dunn's multiple comparisons test.

**A**

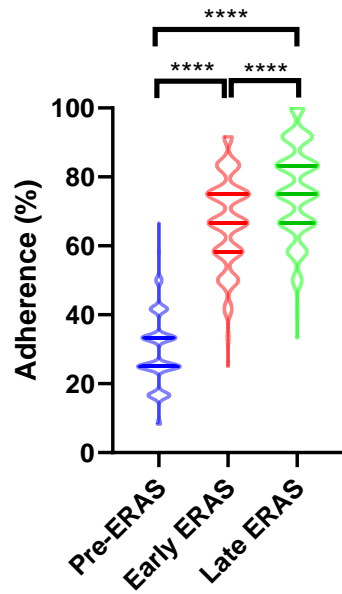

**B**

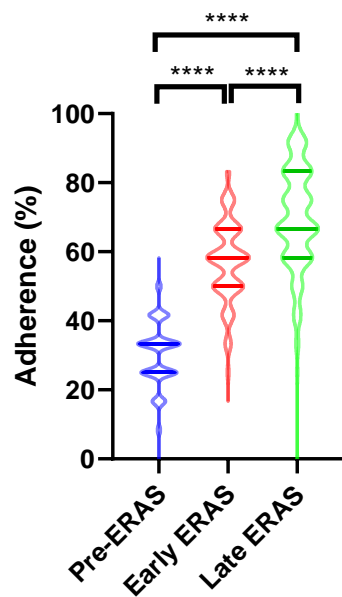

Supplement: NIHMS1635701-supplement-Supplementary_Figure_1.pdf [file NIHMS1635701-supplement-Supplementary_Figure_1.pdf]
