# Supplementary material
Source: PubMed Central journal article supplement (PMC7643765)

**Supplementary Figure 2. Length of stay decreased after ERAS intervention and between early and late ERAS periods: (A) MIS cases, and (B) Open cases.** Box and whisker plots. LOS, length of stay. ERAS, Enhanced Recovery after surgery.  $p$  = ordinary one-way ANOVA, Tukey's multiple comparisons test.

**A**

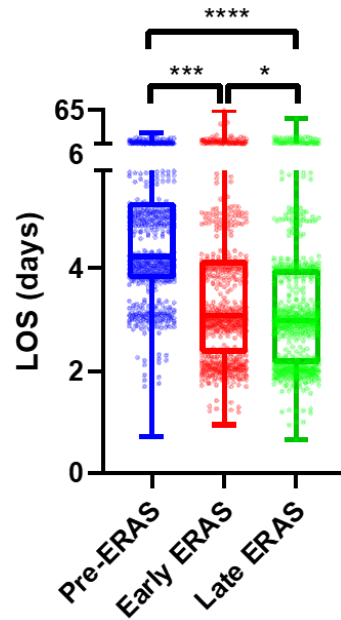

**B**

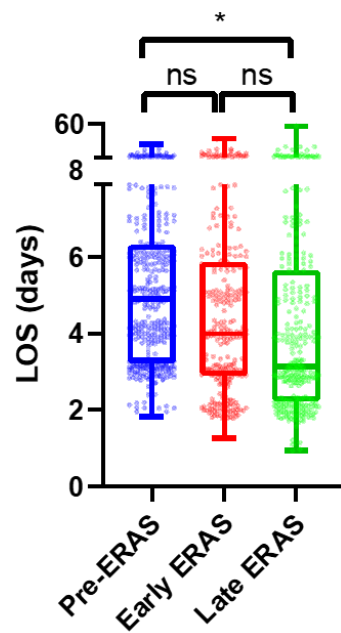

Supplement: NIHMS1635701-supplement-Supplementary_Figure_2.pdf [file NIHMS1635701-supplement-Supplementary_Figure_2.pdf]
