# Supplementary material
Source: PubMed Central journal article supplement (PMC7643765)

**Supplementary Figure 4. Length of stay vs 30-day readmission rates, before (A) and after (B) ERAS intervention: Open cases.** LOS, length of stay. ERAS, Enhanced Recovery after surgery. Estimated 95% confidence intervals.  $p =$  chi-square test.

**A**

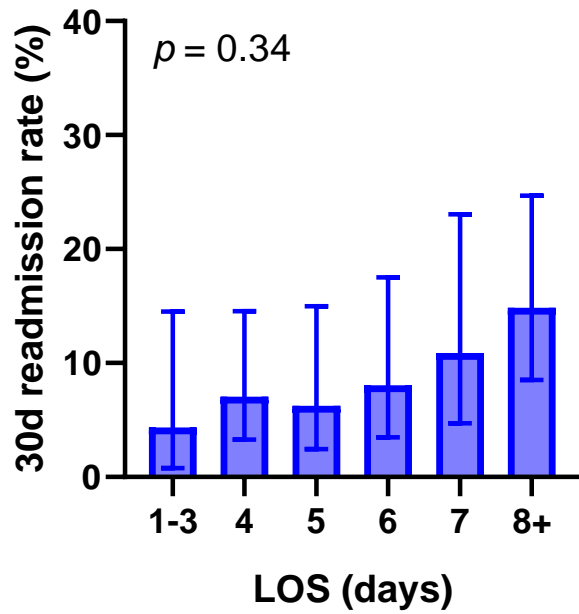

**B**

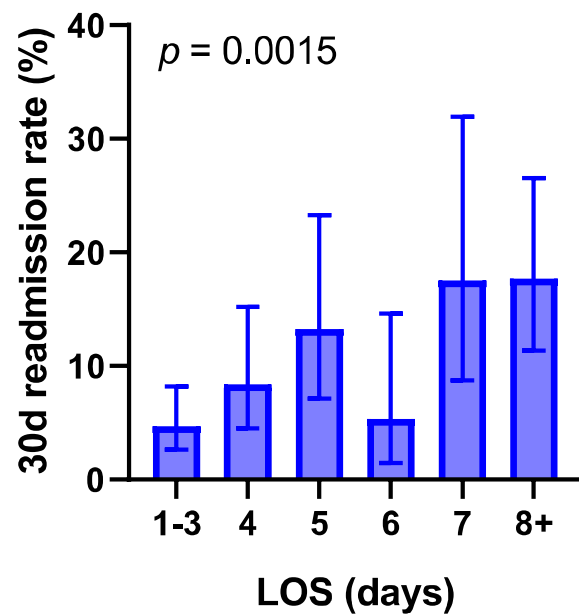

Supplement: NIHMS1635701-supplement-Supplementary_Figure_4.pdf [file NIHMS1635701-supplement-Supplementary_Figure_4.pdf]
