# Supplementary material
Source: PubMed Central journal article supplement (PMC7643765)
Supplement: NIHMS1635701-supplement-Supplementary_Table_1.pdf [file NIHMS1635701-supplement-Supplementary_Table_1.pdf]

**Supplementary Table 1. Memorial Sloan Kettering Cancer Center colorectal ERAS program.** All interventions are modified as clinically appropriate based on patient factors and perioperative course.

|                                                                                                                                                                                                                                                                                                                                                                                                                                                                                                                                                                                                                                                                                                                                                                                                                        |
|------------------------------------------------------------------------------------------------------------------------------------------------------------------------------------------------------------------------------------------------------------------------------------------------------------------------------------------------------------------------------------------------------------------------------------------------------------------------------------------------------------------------------------------------------------------------------------------------------------------------------------------------------------------------------------------------------------------------------------------------------------------------------------------------------------------------|
| <p><b>Narcotic-sparing analgesic strategies</b></p> <ul style="list-style-type: none"><li>• Pre-operative interventions<ul style="list-style-type: none"><li>• Alvimopan</li><li>• Gabapentin</li><li>• Transversus abdominis plane block or epidural</li></ul></li><li>• Intra-operative interventions<ul style="list-style-type: none"><li>• Transversus abdominis plane block (if not performed pre-operatively)</li><li>• Ketamine or dexmedetomidine infusion</li><li>• IV acetaminophen, +/- IV ketorolac</li></ul></li><li>• Postoperative interventions<ul style="list-style-type: none"><li>• Scheduled PO acetaminophen</li><li>• Scheduled NSAIDs<ul style="list-style-type: none"><li>• Ketorolac IV x24h, then diclofenac or ibuprofen PO</li></ul></li><li>• Scheduled PO gabapentin</li></ul></li></ul> |
| <p><b>Fluid status</b></p> <ul style="list-style-type: none"><li>• Preoperative interventions<ul style="list-style-type: none"><li>• Hydration: Clearfast (or 12 oz clears) 2 hours prior</li></ul></li><li>• Intraoperative interventions<ul style="list-style-type: none"><li>• Goal-directed intravenous fluid (IVF) management</li></ul></li><li>• Postoperative interventions<ul style="list-style-type: none"><li>• POD #0: KVO IVF</li><li>• POD #1: Cap off IV</li></ul></li></ul>                                                                                                                                                                                                                                                                                                                             |
| <p><b>Early feeding</b></p> <ul style="list-style-type: none"><li>• POD #0: Full liquid diet</li><li>• POD #1: Regular diet as tolerated</li></ul>                                                                                                                                                                                                                                                                                                                                                                                                                                                                                                                                                                                                                                                                     |
| <p><b>Early mobilization</b></p> <ul style="list-style-type: none"><li>• POD #0: Out of bed to chair</li><li>• POD #1: Ambulate</li><li>• POD #1: Discontinue urinary catheter</li></ul>                                                                                                                                                                                                                                                                                                                                                                                                                                                                                                                                                                                                                               |

POD, postoperative day. KVO, keep vein open.
