# Supplementary material
Source: PubMed Central journal article supplement (PMC7643765)
Supplement: NIHMS1635701-supplement-Supplementary_Table_2.pdf [file NIHMS1635701-supplement-Supplementary_Table_2.pdf]

**Supplementary Table 2. Patient demographics and operation characteristics: MIS cases.**

|                                                  | Pre-ERAS       | ERAS (early)   | ERAS (late)    | <i>p</i> |
|--------------------------------------------------|----------------|----------------|----------------|----------|
| <b>n</b>                                         | <b>623</b>     | <b>701</b>     | <b>697</b>     |          |
| <b>Age [mean, years (SD)]</b>                    | 58.2 (13.7)    | 59.1 (13.3)    | 58.8 (13.2)    | 0.46     |
| <b>Sex, male (%)</b>                             | 331 (53)       | 393 (56)       | 371 (53)       | 0.47     |
| <b>Race/ethnicity (%)</b>                        |                |                |                | 0.002    |
| <b>Asian or Indian subcontinental</b>            | 38 (6.1)       | 42 (6.0)       | 64 (9.2)       |          |
| <b>Black or African American</b>                 | 44 (7.1)       | 41 (5.8)       | 32 (4.6)       |          |
| <b>Hispanic or Latino</b>                        | 22 (3.5)       | 31 (4.4)       | 43 (6.2)       |          |
| <b>Native American – American Indian/Alaskan</b> | 0 (0)          | 3 (0.4)        | 0 (0)          |          |
| <b>Native Hawaiian or Pacific Islander</b>       | 1 (0.2)        | 2 (0.3)        | 0 (0)          |          |
| <b>White</b>                                     | 479 (76.9)     | 552 (78.7)     | 537 (77.0)     |          |
| <b>Unknown</b>                                   | 39 (6.3)       | 30 (4.3)       | 21 (3.0)       |          |
| <b>ASA class (%)</b>                             |                |                |                | 0.77     |
| <b>P1</b>                                        | 3 (0.5)        | 1 (0.1)        | 2 (0.3)        |          |
| <b>P2</b>                                        | 204 (32.7)     | 211 (30.1)     | 213 (30.6)     |          |
| <b>P3</b>                                        | 407 (65.3)     | 474 (67.6)     | 469 (67.3)     |          |
| <b>P4</b>                                        | 9 (1.4)        | 15 (2.1)       | 13 (1.9)       |          |
| <b>BMI [mean, kg/m<sup>2</sup> (SD)]</b>         | 28.7 (5.9)     | 28.7 (6.1)     | 28.4 (6.1)     | 0.50     |
| <b>Surgery description</b>                       |                |                |                | 0.001    |
| <b>Colon resection (%)</b>                       | 459 (73.7)     | 504 (71.9)     | 454 (65.1)     |          |
| <b>Rectal resection (%)</b>                      | 142 (22.8)     | 163 (23.3)     | 189 (27.1)     |          |
| <b>Other (%)</b>                                 | 22 (3.5)       | 34 (4.9)       | 54 (7.7)       |          |
| <b>Stomal diversion</b>                          |                |                |                | 0.43     |
| <b>Colostomy (%)</b>                             | 50 (8.0)       | 53 (7.6)       | 72 (10.3)      |          |
| <b>Ileostomy (%)</b>                             | 94 (15.1)      | 105 (15.0)     | 102 (14.6)     |          |
| <b>None (%)</b>                                  | 479 (76.9)     | 543 (77.5)     | 523 (75.0)     |          |
| <b>EBL [median, mL (i.q.r)]</b>                  | 100 (50 – 223) | 100 (50 – 200) | 100 (50 – 200) | 0.002    |
| <b>Duration of surgery [mean, hours (SD)]</b>    | 4.0 (1.8)      | 3.8 (1.7)      | 4.0 (1.6)      | 0.014    |

ERAS, Enhanced Recovery after surgery. SD, standard deviation. ASA, American Society of Anesthesiologists. BMI, body mass index. EBL, estimated blood loss. i.q.r., interquartile range.

*p* = chi-square test for categorical variables; analysis of variance / t-test or Kruskal-Wallis test (nonparametric) for continuous variables.
