# Supplementary material
Source: PubMed Central journal article supplement (PMC7643765)
Supplement: NIHMS1635701-supplement-Supplementary_Table_3.pdf [file NIHMS1635701-supplement-Supplementary_Table_3.pdf]

**Supplementary Table 3. Patient demographics and operation characteristics: Open cases.**

|                                               | Pre-ERAS      | ERAS (early)  | ERAS (late)   | <i>p</i> |
|-----------------------------------------------|---------------|---------------|---------------|----------|
| <b>n</b>                                      | <b>377</b>    | <b>299</b>    | <b>303</b>    |          |
| <b>Age [mean, years (SD)]</b>                 | 58.3 (13.2)   | 58.1 (13.2)   | 58.0 (12.9)   | 0.97     |
| <b>Sex, male (%)</b>                          | 199 (53)      | 161 (54)      | 165 (55)      | 0.91     |
| <b>Race/ethnicity (%)</b>                     |               |               |               | 0.16     |
| <b>Asian or Indian subcontinental</b>         | 20 (5.3)      | 20 (6.7)      | 28 (9.2)      |          |
| <b>Black or African American</b>              | 27 (7.2)      | 14 (4.7)      | 10 (3.3)      |          |
| <b>Hispanic or Latino</b>                     | 13 (3.4)      | 15 (5.0)      | 12 (4.0)      |          |
| <b>Native Hawaiian or Pacific Islander</b>    | 0 (0)         | 1 (0.3)       | 0 (0)         |          |
| <b>White</b>                                  | 300 (79.6)    | 233 (77.9)    | 244 (80.5)    |          |
| <b>Unknown</b>                                | 17 (4.5)      | 16 (5.4)      | 9 (3.0)       |          |
| <b>ASA class (%)</b>                          |               |               |               | 0.31     |
| <b>P1</b>                                     | 1 (0.3)       | 1 (0.3)       | 0 (0)         |          |
| <b>P2</b>                                     | 91 (24.1)     | 78 (26.1)     | 73 (24.1)     |          |
| <b>P3</b>                                     | 278 (73.7)    | 208 (69.6)    | 226 (74.6)    |          |
| <b>P4</b>                                     | 7 (1.9)       | 12 (4.0)      | 4 (1.3)       |          |
| <b>BMI [mean, kg/m<sup>2</sup> (SD)]</b>      | 28.1 (6.1)    | 27.5 (5.6)    | 26.9 (5.9)    | 0.042    |
| <b>Surgery description</b>                    |               |               |               | 0.002    |
| <b>Colon resection (%)</b>                    | 136 (36.1)    | 80 (26.8)     | 73 (24.1)     |          |
| <b>Rectal resection (%)</b>                   | 29 (7.7)      | 38 (12.7)     | 21 (6.9)      |          |
| <b>Ostomy reversal (%)</b>                    | 195 (51.7)    | 163 (54.5)    | 189 (62.4)    |          |
| <b>Other (%)</b>                              | 17 (4.5)      | 18 (6.0)      | 20 (6.6)      |          |
| <b>Stomal diversion</b>                       |               |               |               | 0.50     |
| <b>Colostomy (%)</b>                          | 20 (5.3)      | 22 (7.4)      | 15 (5.0)      |          |
| <b>Ileostomy (%)</b>                          | 21 (5.6)      | 13 (4.3)      | 11 (3.6)      |          |
| <b>None (%)</b>                               | 336 (89.1)    | 264 (88.3)    | 277 (91.4)    |          |
| <b>EBL [median, mL (i.q.r)]</b>               | 50 (20 – 200) | 50 (20 – 300) | 40 (15 – 175) | 0.13     |
| <b>Duration of surgery [mean, hours (SD)]</b> | 2.3 (1.6)     | 2.5 (2.0)     | 2.3 (1.8)     | 0.33     |

ERAS, Enhanced Recovery after surgery. SD, standard deviation. ASA, American Society of Anesthesiologists. BMI, body mass index. EBL, estimated blood loss. i.q.r., interquartile range.

*p* = chi-square test for categorical variables; analysis of variance / t-test or Kruskal-Wallis test (nonparametric) for continuous variables.
