# Supplementary material
Source: PubMed Central journal article supplement (PMC7643765)
Supplement: NIHMS1635701-supplement-Supplementary_Table_4.pdf [file NIHMS1635701-supplement-Supplementary_Table_4.pdf]

**Supplementary Table 4. ERAS adherence: MIS cases.**

|                                         |                                             | Pre-ERAS               | ERAS (early) | ERAS (late)  | <i>p</i>               |
|-----------------------------------------|---------------------------------------------|------------------------|--------------|--------------|------------------------|
|                                         | n                                           | 623                    | 701          | 697          |                        |
| <b>Preoperative</b>                     | ClearFast (%)                               | 0 (0)                  | 62 (8.8)     | 499 (71.6)   | <0.001 <sup>abc</sup>  |
|                                         | Alvimopan (%)                               | 0 (0)                  | 598 (85.3)   | 634 (91.0)   | <0.001 <sup>abc</sup>  |
|                                         | Gabapentin (%)                              | 0 (0)                  | 613 (87.4)   | 652 (93.5)   | <0.001 <sup>abc</sup>  |
| <b>Preoperative/<br/>Intraoperative</b> | TAP block or Epidural (%)                   | 200 (32.1)             | 635 (90.6)   | 648 (93.0)   | <0.001 <sup>ab</sup>   |
|                                         | <b>Intraoperative</b>                       | Nonopioid infusion (%) | 153 (24.6)   | 618 (88.2)   | 628 (90.1)             |
| <b>Postoperative</b>                    | Acetaminophen (%)                           | 613 (98.4)             | 691 (98.6)   | 680 (97.6)   | 0.33                   |
|                                         | NSAID (%)                                   | 393 (63.1)             | 601 (85.7)   | 496 (71.2)   | <0.001 <sup>abc</sup>  |
|                                         | Gabapentin (%)                              | 40 (6.4)               | 245 (35.0)   | 368 (52.8)   | <0.001 <sup>abc</sup>  |
|                                         | No rescue opioid (%)                        | 17 (2.7)               | 327 (46.6)   | 384 (55.1)   | <0.001 <sup>abc</sup>  |
|                                         | Urinary catheter duration [mean, days (SD)] | 2.0 (1.2)              | 1.4 (1.2)    | 1.3 (0.9)    | <0.001 <sup>ab</sup>   |
|                                         | Time to ambulation [mean, days (SD)]        | 0.6 (0.5)              | 0.6 (0.6)    | 0.5 (0.5)    | 0.024 <sup>b</sup>     |
|                                         | Time to regular diet [mean, days (SD)]      | 3.0 (1.5)              | 2.3 (2.2)    | 1.8 (1.6)    | <0.001 <sup>abc</sup>  |
| <b>Overall</b>                          | Adherence [median, % (i.q.r.)]              | 25 (25 – 33)           | 67 (58 – 75) | 75 (67 – 83) | <0.0001 <sup>abc</sup> |

ERAS, Enhanced Recovery after surgery. TAP, transversus abdominis plane. NSAID, non-steroidal anti-inflammatory. SD, standard deviation. i.q.r., interquartile range.

*p* = chi-square test for categorical variables; analysis of variance / t-test with Tukey's multiple comparisons test or Kruskal-Wallis (nonparametric) with Dunn's multiple comparisons test for continuous variables.

<sup>a</sup>, significant for Pre- vs Early ERAS. <sup>b</sup>, significant for Pre- vs Late ERAS. <sup>c</sup>, significant for Early vs Late ERAS.
