# Supplementary material
Source: PubMed Central journal article supplement (PMC7643765)
Supplement: NIHMS1635701-supplement-Supplementary_Table_5.pdf [file NIHMS1635701-supplement-Supplementary_Table_5.pdf]

**Supplementary Table 5. ERAS adherence: Open cases.**

|                                    |                                             | Pre-ERAS     | ERAS (early) | ERAS (late)  | <i>p</i>               |
|------------------------------------|---------------------------------------------|--------------|--------------|--------------|------------------------|
| n                                  |                                             | 377          | 299          | 303          |                        |
| <b>Preoperative</b>                | ClearFast (%)                               | 0 (0)        | 20 (6.7)     | 203 (67.0)   | <0.001 <sup>abc</sup>  |
|                                    | Alvimopan (%)                               | 0 (0)        | 237 (79.3)   | 256 (84.5)   | <0.001 <sup>ab</sup>   |
|                                    | Gabapentin (%)                              | 0 (0)        | 253 (84.6)   | 265 (87.5)   | <0.001 <sup>ab</sup>   |
| <b>Preoperative/Intraoperative</b> |                                             |              |              |              |                        |
|                                    | TAP block or Epidural (%)                   | 114 (30.2)   | 214 (71.6)   | 277 (91.4)   | <0.001 <sup>abc</sup>  |
| <b>Intraoperative</b>              |                                             |              |              |              |                        |
|                                    | Nonopioid infusion (%)                      | 44 (11.7)    | 141 (47.2)   | 158 (52.1)   | <0.001 <sup>ab</sup>   |
| <b>Postoperative</b>               |                                             |              |              |              |                        |
|                                    | Acetaminophen (%)                           | 370 (98.1)   | 292 (97.7)   | 289 (95.4)   | 0.081                  |
|                                    | NSAID (%)                                   | 259 (68.7)   | 264 (88.3)   | 252 (83.2)   | <0.001 <sup>ab</sup>   |
|                                    | Gabapentin (%)                              | 21 (5.6)     | 85 (28.4)    | 127 (41.9)   | <0.001 <sup>abc</sup>  |
|                                    | No rescue opioid (%)                        | 2 (0.5)      | 38 (12.7)    | 84 (27.7)    | <0.001 <sup>abc</sup>  |
|                                    | Urinary catheter duration [mean, days (SD)] | 2.3 (1.6)    | 2.2 (1.6)    | 2.1 (1.5)    | 0.31                   |
|                                    | Time to ambulation [mean, days (SD)]        | 0.6 (1.0)    | 0.6 (0.6)    | 0.6 (0.6)    | 0.44                   |
|                                    | Time to regular diet [mean, days (SD)]      | 3.7 (2.4)    | 2.9 (2.1)    | 2.4 (2.0)    | <0.001 <sup>abc</sup>  |
| <b>Overall</b>                     |                                             |              |              |              |                        |
|                                    | Adherence [median, % (i.q.r.)]              | 33 (25 – 33) | 58 (50 – 67) | 67 (58 – 83) | <0.0001 <sup>abc</sup> |

ERAS, Enhanced Recovery after surgery. TAP, transversus abdominis plane. NSAID, non-steroidal anti-inflammatory. SD, standard deviation. i.q.r., interquartile range.

*p* = chi-square test for categorical variables; analysis of variance / t-test with Tukey's multiple comparisons test or Kruskal-Wallis (nonparametric) with Dunn's multiple comparisons test for continuous variables.

<sup>a</sup>, significant for Pre- vs Early ERAS. <sup>b</sup>, significant for Pre- vs Late ERAS. <sup>c</sup>, significant for Early vs Late ERAS.
