# Supplementary material
Source: PubMed Central journal article supplement (PMC7643765)
Supplement: NIHMS1635701-supplement-Supplementary_Table_6.pdf [file NIHMS1635701-supplement-Supplementary_Table_6.pdf]

**Supplementary Table 6a. Complications: MIS cases.**

|                                       | Pre-ERAS   | ERAS (early) | ERAS (late) | <i>p</i> |
|---------------------------------------|------------|--------------|-------------|----------|
| <b>n</b>                              | <b>623</b> | <b>701</b>   | <b>697</b>  |          |
| <b>Grade</b>                          |            |              |             | 0.42     |
| <b>No complication</b>                | 562 (90.2) | 622 (88.7)   | 630 (90.4)  |          |
| <b>1</b>                              | 17 (2.7)   | 27 (3.9)     | 19 (2.7)    |          |
| <b>2</b>                              | 28 (4.5)   | 27 (3.9)     | 24 (3.4)    |          |
| <b>3</b>                              | 16 (2.6)   | 20 (2.9)     | 23 (3.3)    |          |
| <b>4</b>                              | 0 (0)      | 4 (0.6)      | 1 (0.1)     |          |
| <b>5</b>                              | 0 (0)      | 1 (0.1)      | 0 (0)       |          |
| <b>Category</b>                       |            |              |             | 0.22     |
| <b>Cardiovascular system</b>          | 2 (0.3)    | 5 (0.7)      | 1 (0.1)     |          |
| <b>Endocrine system</b>               | 0 (0)      | 1 (0.1)      | 0 (0)       |          |
| <b>Gastrointestinal system</b>        | 24 (3.9)   | 32 (4.6)     | 35 (5.0)    |          |
| <b>General</b>                        | 2 (0.3)    | 3 (0.4)      | 5 (0.7)     |          |
| <b>Genitourinary system</b>           | 7 (1.1)    | 2 (0.3)      | 4 (0.6)     |          |
| <b>Hematologic or vascular system</b> | 6 (1.0)    | 10 (1.4)     | 1 (0.1)     |          |
| <b>Infection</b>                      | 10 (1.6)   | 17 (2.4)     | 10 (1.4)    |          |
| <b>Metabolic</b>                      | 0 (0)      | 1 (0.1)      | 0 (0)       |          |
| <b>Musculoskeletal system</b>         | 0 (0)      | 2 (0.3)      | 2 (0.3)     |          |
| <b>Nervous system</b>                 | 2 (0.3)    | 0 (0)        | 0 (0)       |          |
| <b>Pulmonary system</b>               | 1 (0.2)    | 1 (0.1)      | 1 (0.1)     |          |
| <b>Wound or skin</b>                  | 7 (1.1)    | 5 (0.7)      | 8 (1.1)     |          |

ERAS, Enhanced Recovery after surgery. *p* = chi-square test.

**Supplementary Table 6b. Surgical site infections: MIS cases, from SSI surveillance cases reported to National Healthcare Safety Network.**

|                       | Pre-ERAS          | ERAS (early)      | ERAS (late)       | <i>p</i> |
|-----------------------|-------------------|-------------------|-------------------|----------|
| <b>n reported (%)</b> | <b>361 (57.9)</b> | <b>611 (87.2)</b> | <b>596 (85.5)</b> |          |
| <b>SSI type</b>       |                   |                   |                   |          |
| <b>SIP (%)</b>        | 3 (0.8)           | 5 (0.8)           | 1 (0.2)           | 0.25     |
| <b>DIP (%)</b>        | 1 (0.3)           | 0 (0)             | 0 (0)             | 0.19     |
| <b>IAB (%)</b>        | 5 (1.4)           | 14 (2.3)          | 15 (2.5)          | 0.49     |

ERAS, Enhanced Recovery after surgery. SSI, surgical site infection. SIP, superficial incisional primary. DIP, deep incisional primary. IAB, intraabdominal infection. *p* = chi-square test.
